# Supplementary material for: Continuation rates of alpha-blockers mono-therapy in adult men, prescribed by urologists or general practitioners: a pharmacy-based study
Source: PubMed Central journal article supplement (PMC6684751; doi:10.1007/s00345-018-2557-3), 2018-11-13

**Figure 2.** Numbers and percentages of patients who discontinued and continued  $\alpha$ -blocker treatment (with or without gap) with first prescription by general practitioner.

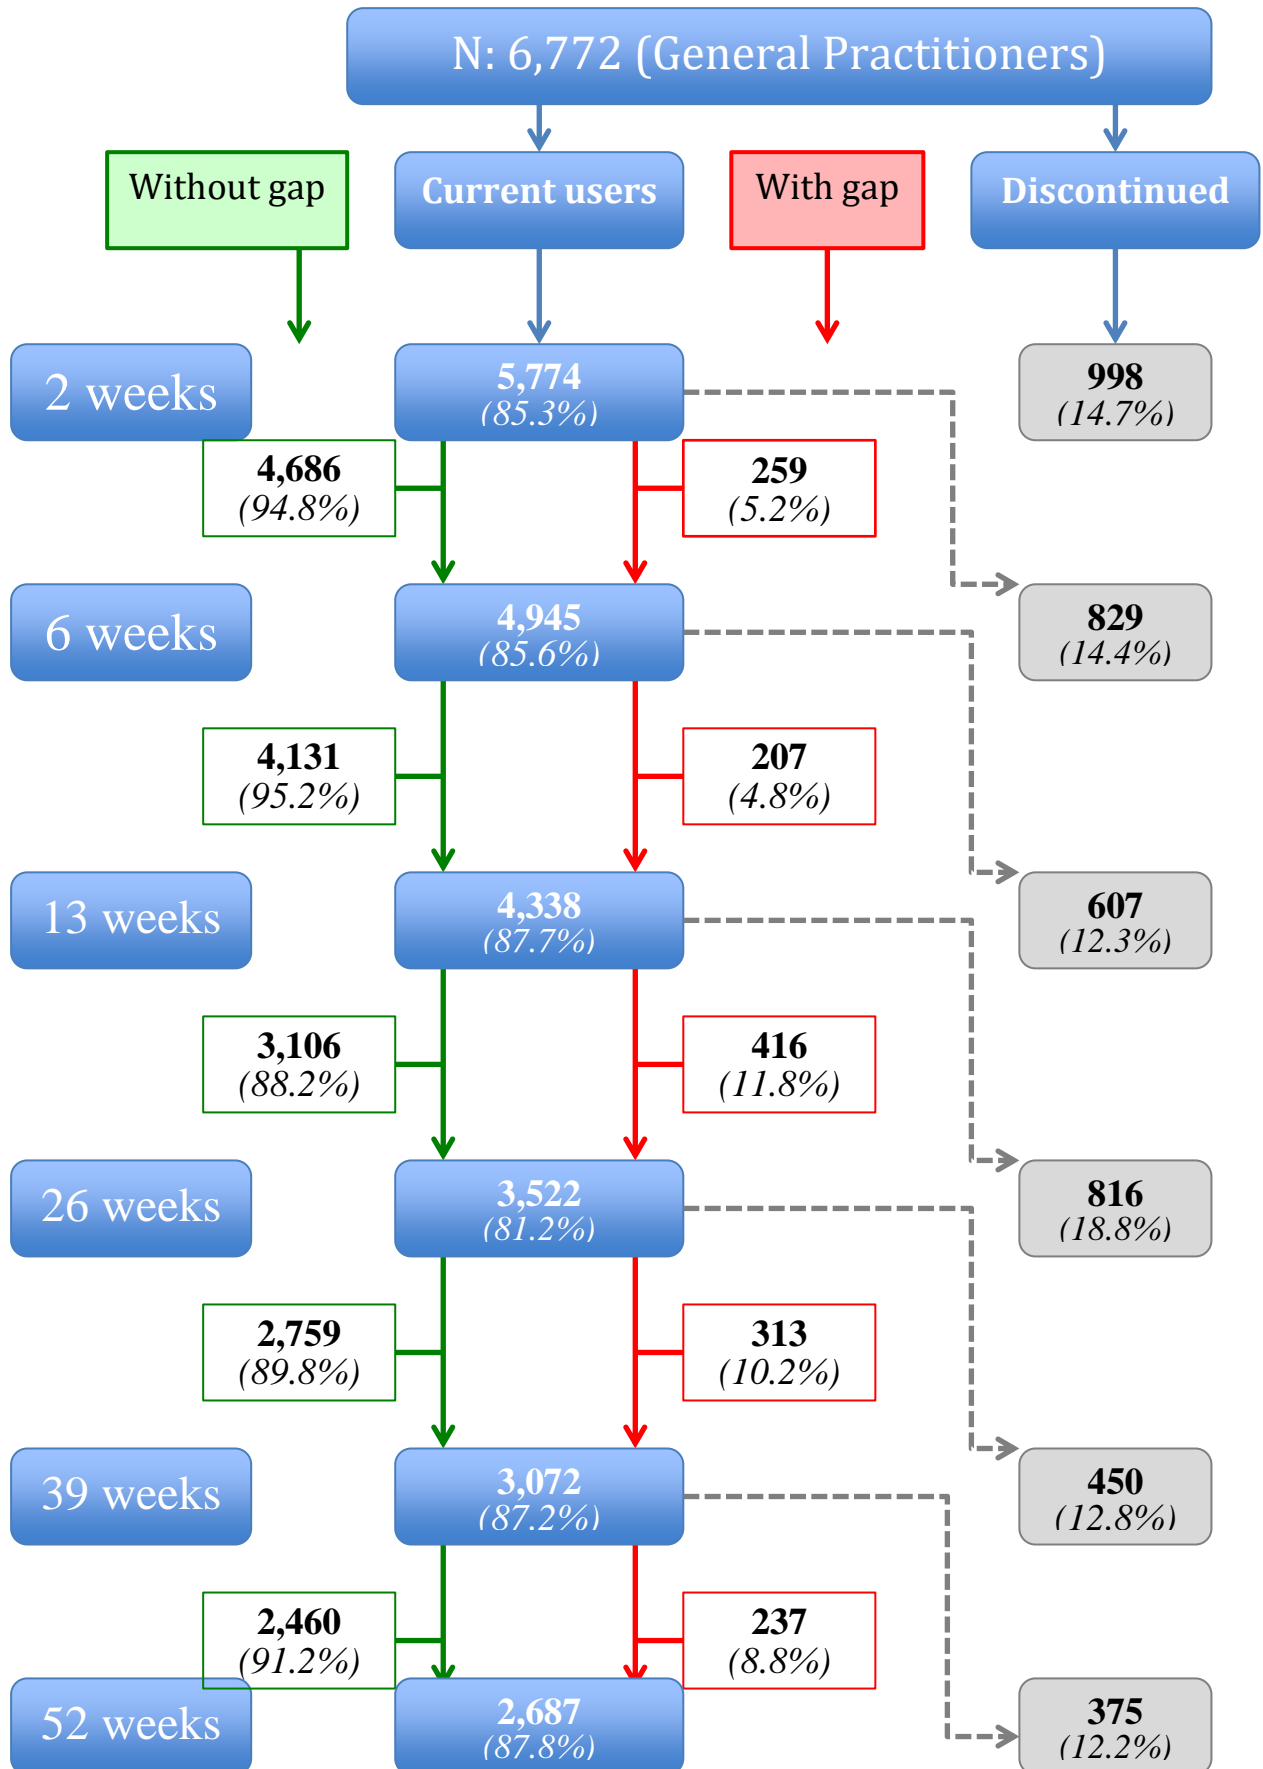

Supplement: 345_2018_2557_MOESM1_ESM.pdf [file 345_2018_2557_MOESM1_ESM.pdf]
